# Supplementary material for: Fatty Acids of CLA-Enriched Egg Yolks Can Induce Transcriptional Activation of Peroxisome Proliferator-Activated Receptors in MCF-7 Breast Cancer Cells
Source: Hindawi journal article supplement (doi:10.1155/2017/2865283), 2017-01-01
Supplement: f1 [file 2865283.f1.pdf]

S1 Figure. Control of transfection

**A) PPAR $\alpha$**

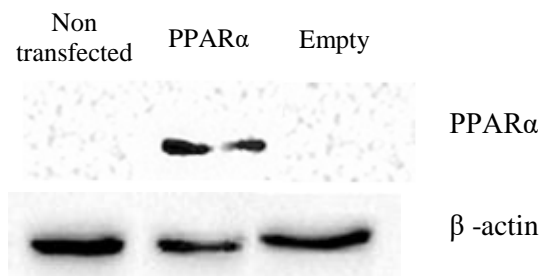

**B) PPAR $\delta$**

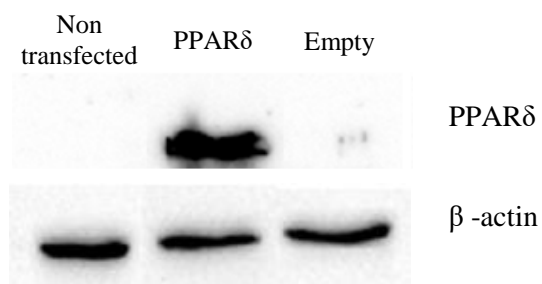

**C) PPAR $\gamma$**

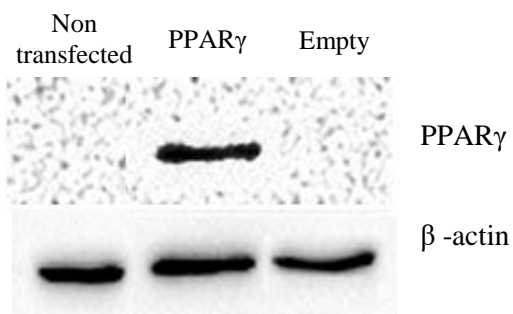

Non-transfected, wild MCF-7 cells; PPAR $\alpha$ , MCF-7 cells transfected with pcDNA 6.2PPAR $\alpha$  plasmid; PPAR $\delta$ , MCF-7 cells transfected with pcDNA 6.2PPAR $\delta$  plasmid; PPAR $\gamma$ , MCF-7 cells transfected with pcDNA 6.2PPAR $\gamma$  plasmid; Empty, MCF-7 cells transfected with pcDNA 6.2 plasmid; β -actin, actin beta.

S1 Table. Nucleotide sequences of primers

| Gene                           | Primers forward 5'→3'   | Primers reverse 5'→3' | NCBI Reference Sequence |
|--------------------------------|-------------------------|-----------------------|-------------------------|
| <i>PPARA</i>                   | CGTTATCTGAAGAGTTCCTG    | GTGAAAGCGTGTCCCGTGATG | NM_001001928.2          |
| <i>PPARD</i>                   | CACATCTACAATGCCTACCTGA  | CTGCCTGCCACAATGTCTCG  | NM_001171820.1          |
| <i>PPARG</i>                   | TGGAACCTTGATGACAGTGACCT | TGTCAGAGCTCAGGCACAGT  | NM_005037.5             |
| <i>TCF20</i>                   | GAGCAGCCTTTGTTGTAGCAG   | GGTTTGTGGCAGGCTCTATG  | NM_005650               |
| <i>THRB</i><br>( <i>TRβ2</i> ) | TGCCCAGACCTTCCAAACG     | AACCCTTGCAGCCTTCACAC  | NM_001252634.1          |
| <i>WT1</i>                     | CATGCTTGAATGAGTGGTTG    | CGCAATCAGGGTTACAGCAC  | NM_000378               |
| <i>ZNF621</i>                  | GCATAATTCTCCAGCATCACC   | ACCCAGAAGACAGTGCATGA  | NM_001098414.2          |
| <i>ACTB</i>                    | GCTGGGGTGTTGAAGGTCTC    | CGGCATCGTCACCAACTG    | NM_001101.3             |
| <i>GAPDH</i>                   | ACCATCTTCCAGGAGCGAGA    | GACTCCACGACGTAATCAGC  | NM_001289746.1          |
| <i>HPRT1</i>                   | CAGAGGGCTACAATGTGATG    | TGGCGTCGTGATTAGTGATG  | NM_000194.2             |
| <i>HSP90AB1</i>                | CCACTTGGCAGTCAAGCACT    | CACACGGCGGACATAGAGTT  | NM_001271972.1          |

*ACTB*, actin, beta; *GAPDH*, glyceraldehyde-3-phosphate dehydrogenase; *HPRT1*, hypoxanthine phosphoribosyltransferase 1; *HSP90AB1*, heat shock protein 90kDa alpha (cytosolic); *PPARA*, peroxisome proliferator activated receptor alpha; *PPARD*, peroxisome proliferator activated receptor delta; *PPARG*, peroxisome proliferator activated receptor gamma; *TCF20*, transcription factor 20; *THRB*, thyroid hormone receptor beta; *WT1*, wilms tumor 1; *ZNF621*, zinc finger protein 621;

S2 Table. **Control of transfections****A)**

| PPARA   | Cells        | Plasmid control     |                      | Insert control      |                      |
|---------|--------------|---------------------|----------------------|---------------------|----------------------|
|         |              | MCF-7               | MCF-7 pcDNA6.2 PPARA | MCF-7               | MCF-7 pcDNA6.2 PPARA |
| Primers | Forward      | TTGGCACCAAAATCAACGG |                      | ACAAGTGCCTGAGCGTGGG |                      |
|         | Reverse      | TCTCCAGGCGATCTGACGG |                      | CTTCAGGTCGGCTGTCTCG |                      |
|         | Cq value I   | N/A                 | 8,04                 | N/A                 | 11,22                |
|         | Cq value II  | N/A                 | 10,31                | N/A                 | 7,04                 |
|         | Cq (ACTB) I  | 20,83               | 21,81                |                     |                      |
|         | Cq (ACTB) II | 20,83               | 21,23                |                     |                      |

**B)**

| PPARD   | Cells        | Plasmid control     |                      | Insert control      |                      |
|---------|--------------|---------------------|----------------------|---------------------|----------------------|
|         |              | MCF-7               | MCF-7 pcDNA6.2 PPARD | MCF-7               | MCF-7 pcDNA6.2 PPARD |
| Primers | Forward      | TTGGCACCAAAATCAACGG |                      | ACAAGTGCCTGAGCGTGGG |                      |
|         | Reverse      | TCTCCAGGCGATCTGACGG |                      | CTTCAGGTCGGCTGTCTCG |                      |
|         | Cq value I   | N/A                 | 8,67                 | N/A                 | 5,68                 |
|         | Cq value II  | N/A                 | 11,01                | N/A                 | 11,94                |
|         | Cq (ACTB) I  | 22,49               | 25,47                |                     |                      |
|         | Cq (ACTB) II | 22,19               | 25,01                |                     |                      |

**C)**

| PPARG   | Cells        | Plasmid control     |                      | Insert control       |                      |
|---------|--------------|---------------------|----------------------|----------------------|----------------------|
|         |              | MCF-7               | MCF-7 pcDNA6.2 PPARG | MCF-7                | MCF-7 pcDNA6.2 PPARG |
| Primers | Forward      | TTGGCACCAAAATCAACGG |                      | CAGGGCTTCATGACCAGAGA |                      |
|         | Reverse      | TCTCCAGGCGATCTGACGG |                      | GCTGTCGTCCAGTTCCAGG  |                      |
|         | Cq value I   | N/A                 | 9,14                 | N/A                  | 5,65                 |
|         | Cq value II  | N/A                 | 10,53                | N/A                  | 5,77                 |
|         | Cq (ACTB) I  | 23,87               | 24,04                |                      |                      |
|         | Cq (ACTB) II | 23,9                | 24,1                 |                      |                      |

**D)**

Nucleotide sequences of primers

| Target             | Primers forward 5'→3' | Primers reverse 5'→3' |
|--------------------|-----------------------|-----------------------|
| pPPARA-137-DNAiRNA | ACAAGTGCCTGAGCGTGGG   | CTTCAGGTCGGCTGTCTCG   |
| pPPARD-136-DNAiRNA | TGGAAGTGGACGACAGCGA   | TGCAGATGGAAGTGGAGGG   |
| pPPARG-114-DNAiRNA | CAGGGCTTCATGACCAGAGA  | GCTGTCGTCCAGTTCCAGG   |
| cDNA6-CMV-136-DNA  | TTGGCACCAAAATCAACGG   | TCTCCAGGCGATCTGACGG   |
